# Supplementary material
Source: PubMed Central journal article supplement (PMC6896333)
Supplement: NIHMS1059746-supplement-Supplemental.pdf [file NIHMS1059746-supplement-Supplemental.pdf]

Liu X, Popescu IR, Denisova JV, Neve RL, Corriveau RA, Belousov AB (2008) Regulation of cholinergic phenotype in developing neurons. *J Neurophysiol* 99:2443-2455.

SUPPLEMENTAL FIGURES

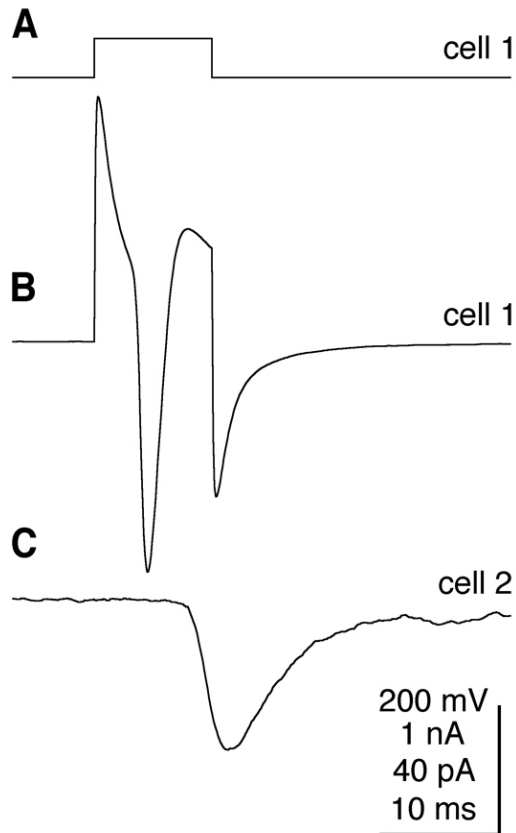

Supplemental Figure 1. Monosynaptic EPSCs in dual whole-cell test in the AP5+CNQX-treated culture. The figure demonstrates a monosynaptic EPSC in dual whole-cell voltage-clamp recording from a pair of synaptically coupled neurons. An inward current evoked in one cell (A, B) generates a monosynaptic EPSC in the other cell (C). Voltage (A) and current (B, C) traces are shown. Vertical calibration bar: 200 mV, A; 1 nA, B; 40 pA, C.

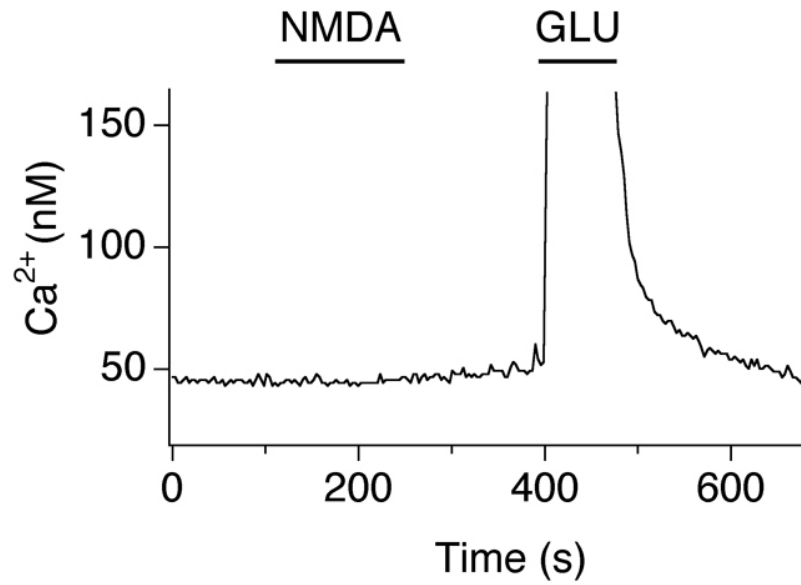

Supplemental Figure 2. Hypothalamic neurons in cultures obtained from NMDAR1 knockout mice are not responsive to NMDA (5  $\mu\text{M}$ ), but do respond to glutamate (10  $\mu\text{M}$ , GLU;  $n=62$  neurons). Representative trace from one neuron in a fura-2 AM  $\text{Ca}^{2+}$  imaging experiment is shown.

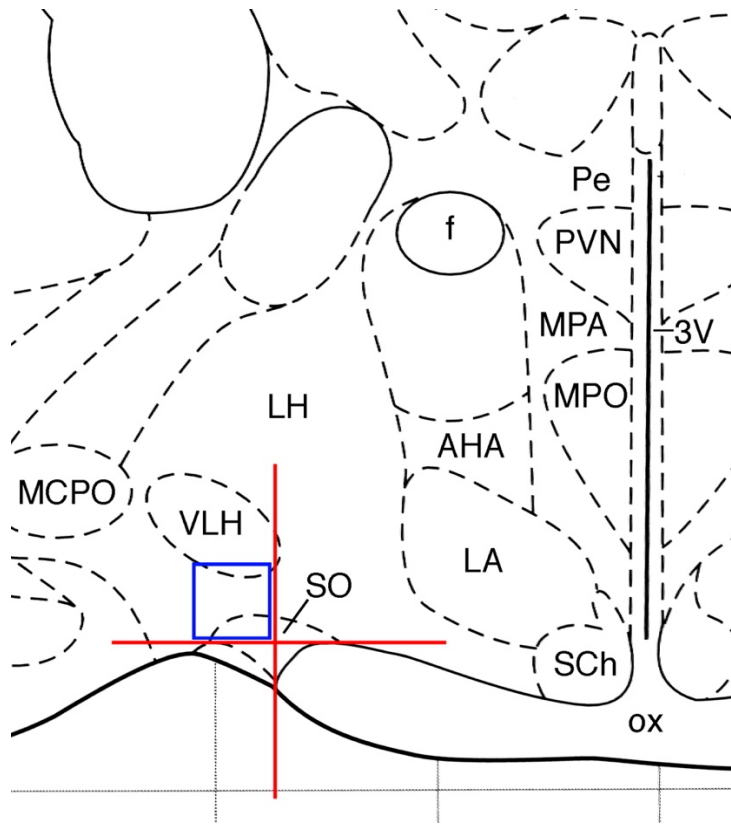

Supplemental Figure 3. This figure shows schematic location of the rat hypothalamic region where ChAT-positive and NeuN-positive cells were counted (rat coronal brain section, Bregma -1.30 mm; adapted from (Paxinos and Watson 1998). The blue colored box represents a 330  $\mu\text{m}$  x 330  $\mu\text{m}$  square field, inside which the cells were counted. Two red lines show schematically the coordinates (relative to the optic chiasm) that were used to allocate the counting box. Abbreviations: 3V, 3<sup>rd</sup> ventricle; AHA, anterior hypothalamic area; f, fornix; LA, lateroanterior hypothalamic nucleus; LH, lateral hypothalamic area; MCPO, magnocellular preoptic nucleus; MPA, medial preoptic area; MPO, medial preoptic nucleus; ox, optic chiasm; Pe, periventricular hypothalamic nucleus; PVN, paraventricular hypothalamic nucleus; SCh, suprachiasmatic nucleus; SO, supraoptic nucleus; VLH, ventrolateral hypothalamic nucleus.
